# Supplementary figures and images for: Impaired brain glymphatic flow in experimental hepatic encephalopathy
Source: PubMed Central journal article supplement — J Hepatol. Author manuscript; Available in PMC 2022 Jul 17. (PMC7613052; doi:10.1016/j.jhep.2018.08.021), 2018-09-08

Olfactory Bulb  
Sham

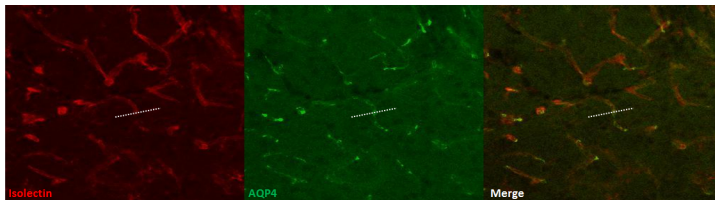

Olfactory Bulb  
BDL

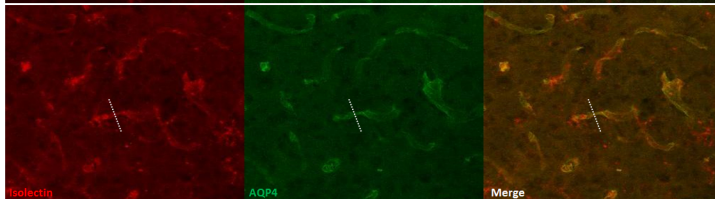

Prefrontal Cortex  
Sham

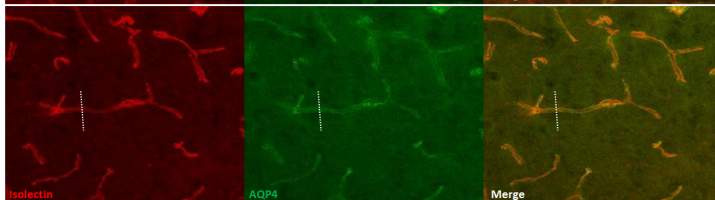

Prefrontal Cortex  
BDL

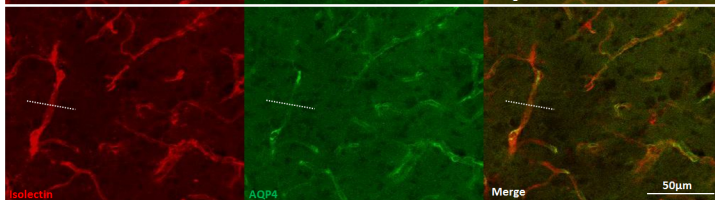

Supplement: EMS146577-supplement-Suppl_Fig_1.pdf [file EMS146577-supplement-Suppl_Fig_1.pdf]
